# Supplementary material for: Amniotic Membrane-Derived Stromal Cells Release Extracellular Vesicles That Favor Regeneration of Dystrophic Skeletal Muscles
Source: MDPI journal article supplement (doi:10.3390/ijms241512457), 2023-08-05
Supplement: s1 [file s1]

## Figure S1

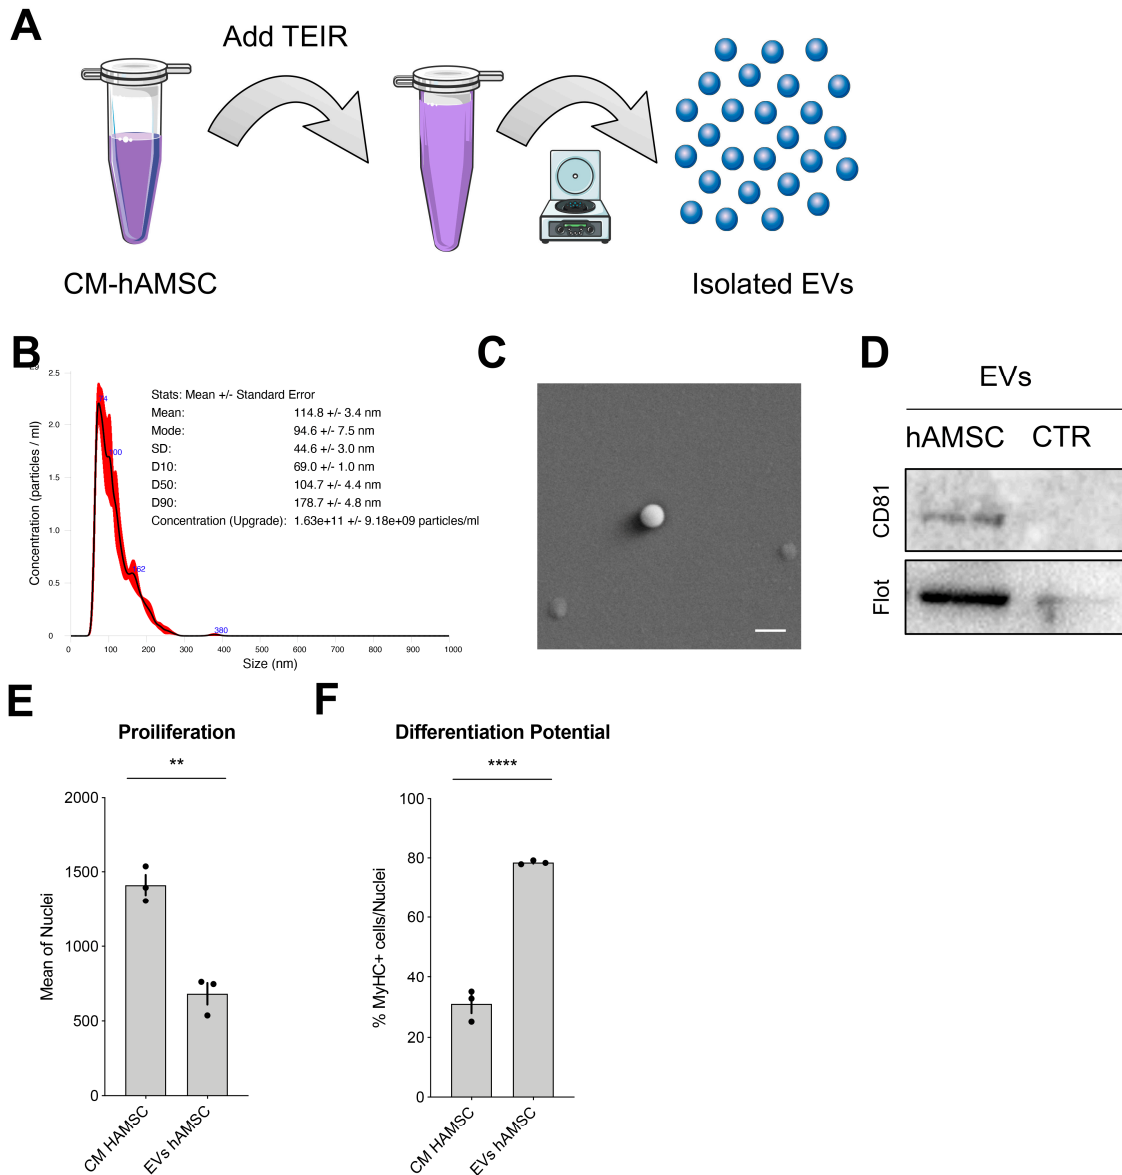

**Figure S1. EVs hAMSC display physical features of exosomes**

**A)** Representative scheme of EVs isolation from serum-free Conditioned Media of hAMSC using the Total Isolation Reagent (TEIR).

**B)** Nanoparticle tracking analysis (NTA) of the EVs isolated from serum-free Conditioned Media of hAMSC. The Line graphs corresponding to average concentration (particles/mL) and size (nm) of particles isolated.

**C)** Representative FESEM micrograph of EVs hAMSC obtained at an accelerating voltage of 4 kV (50,000 $\times$  magnification). Scale bar = 200  $\mu$ m.

**D)** Western blot analysis for CD81 and ALIX antibodies in EVs from serum-free Conditioned Media of hAMSC (EVs hAMSC) and CM CTR (EVs CTR). Full-length blots are presented in Figure S3.

**E)** Graphs showing the mean of nuclei number in MuSCs cultured with Conditioned Media of hAMSC (CM hAMSC) and EVs from serum-free Conditioned Media of hAMSC (EVs hAMSC). (n = 3, biological replicates). All data correspond to the average  $\pm$  SEM. Asterisk (\*) indicates statistical analysis by unpaired t-test; \*\*  $p < 0.01$ .

**F)** Graphs showing the percentage of MyHC positive cells in the condition described in e. (n = 3, biological replicates). All data correspond to the average  $\pm$  SEM. Asterisk (\*) indicates statistical analysis by unpaired t-test; \*\*\*\*  $p < 0.0001$ .

## Figure S2

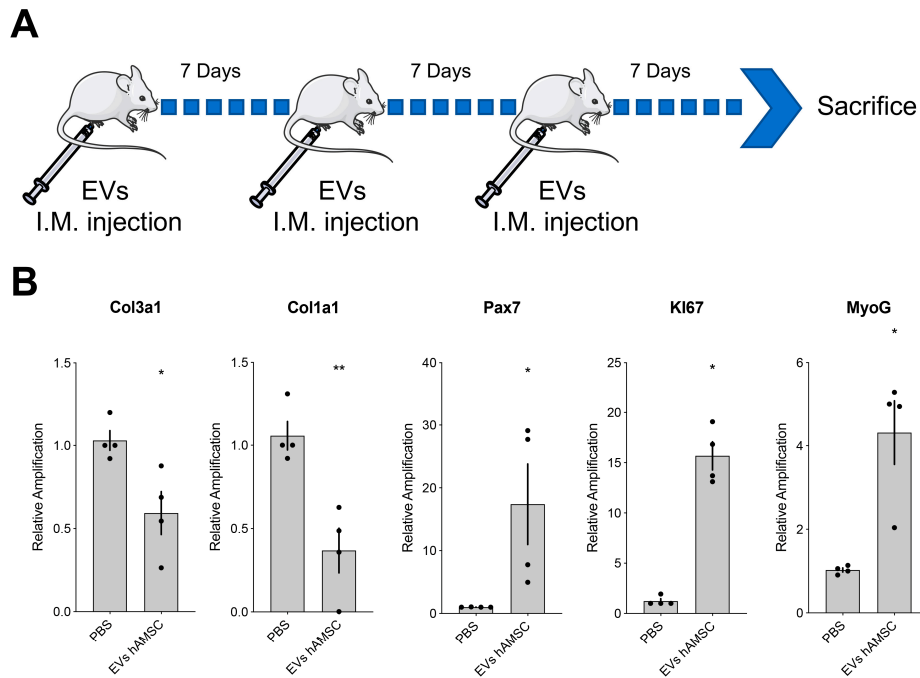

**Figure S2. Beneficial effect of intramuscularly injected EVs hAMSC.**

**A)** Representative scheme of EVs transplantation in mdx mice. Isolated EVs from hAMSC (EVs hAMSC) or PBS were injected in tibialis anterior of mdx mice every 7 days for 21 days.

**B)** Graphs showing the expression levels of several genes in muscle of PBS or EVs hAMSC treated mdx mice. Asterisk (\*) indicates statistical analysis by unpaired *t*-test; \*  $p < 0.05$ , \*\*  $p < 0.01$ . All data correspond to the average  $\pm$  SEM. (n = 4, biological replicates).
